# Supplementary material for: Clustered abasic lesions profoundly change the structure and stability of human telomeric G-quadruplexes
Source: PubMed Central journal article supplement — Nucleic Acids Res. 2017 Mar 22;45(8):4294–305. doi: 10.1093/nar/gkx191 (PMC5416849; doi:10.1093/nar/gkx191), 2017-03-22
Supplement: gkx191_Supp.pdf [file gkx191_Supp.pdf]

**Clustered abasic lesions profoundly change the structure and stability  
of human telomeric G-quadruplexes**

Kejnovská Iva<sup>1</sup>, Bednářová Klára<sup>1</sup>, Renčiuk Daniel<sup>1</sup>, Dvořáková Zuzana<sup>1</sup>, Školáková Petra<sup>1</sup>,

Trantírek Lukáš<sup>2</sup>, Fiala Radovan<sup>2</sup>, Vorlíčková Michaela<sup>1\*</sup>, Sagi Janos<sup>3</sup>

<sup>1</sup> Institute of Biophysics, Czech Academy of Sciences, v.v.i., Královopolská 135, CZ-612 65 Brno, Czech Republic

<sup>2</sup> CEITEC—Central European Institute of Technology, Masaryk University, Kamenice 5, CZ-625 00 Brno, Czech Republic

<sup>3</sup> Rimstone Laboratory, RLI, Carlsbad, CA 92010, U.S.A

\*To whom correspondence should be addressed: Tel.: +420 541517188; e-mail: mifi@ibp.cz

**Table S1:** The htel-22 d[AG<sub>3</sub>(TTAG<sub>3</sub>)<sub>3</sub>] and htel-25 d[TAG<sub>3</sub>(TTAG<sub>3</sub>)<sub>3</sub>TT] used in this paper

| Name                                 | 5'-to-3' sequence                                                   |
|--------------------------------------|---------------------------------------------------------------------|
| <b>Substitutions in the htel-22:</b> |                                                                     |
|                                      | 1            7            13            19    22                    |
| wt-22                                | A GGG TTA <b>A</b> GGG TTA <b>A</b> GGG TTA <b>A</b> GGG            |
|                                      | <i>Loop substitutions</i>                                           |
| ap7                                  | A GGG TT _ GGG TTA GGG TTA GGG                                      |
| ap13                                 | A GGG TTA GGG TT _ GGG TTA GGG                                      |
| ap19                                 | A GGG TTA GGG TTA GGG TT _ GGG                                      |
| ap7,13                               | A GGG TT _ GGG TT _ GGG TTA GGG                                     |
| ap7,19                               | A GGG TT _ GGG TTA GGG TT _ GGG                                     |
| ap13,19                              | A GGG TTA GGG TT _ GGG TT _ GGG                                     |
| ap17,18,19                           | A GGG TTA GGG TTA GGG _ _ _ GGG                                     |
| ap7,13,19                            | A GGG TT _ GGG TT _ GGG TT _ GGG                                    |
| <b>Substitutions in the htel-25:</b> |                                                                     |
|                                      | 1    3,4,5    8            14            20            25           |
| wt-25                                | TA <b>GGG</b> TTA <b>A</b> GGG TTA <b>A</b> GGG TTA <b>A</b> GGG TT |
|                                      | <i>A/AP substitutions</i>                                           |
| ap8                                  | TA GGG TT _ GGG TTA GGG TTA GGG TT                                  |
| ap14                                 | TA GGG TTA GGG TT _ GGG TTA GGG TT                                  |
| ap20                                 | TA GGG TTA GGG TTA GGG TT _ GGG TT                                  |
| ap8,14,20                            | TA GGG TT _ GGG TT _ GGG TT _ GGG TT                                |
|                                      | <i>G/AP substitutions</i>                                           |
| ap3                                  | TA _ GG TTA GGG TTA GGG TTA GGG TT                                  |
| ap4                                  | TA G _ G TTA GGG TTA GGG TTA GGG TT                                 |
| ap5                                  | TA GG _ TTA GGG TTA GGG TTA GGG TT                                  |
|                                      | <i>(A+G)/AP substitutions</i>                                       |
| ap3,8                                | TA _ GG TT _ GGG TTA GGG TTA GGG TT                                 |
| ap4,8                                | TA G _ G TT _ GGG TTA GGG TTA GGG TT                                |
| ap5,8                                | TA GG _ TT _ GGG TTA GGG TTA GGG TT                                 |
| ap3,14                               | TA _ GG TTA GGG TT _ GGG TTA GGG TT                                 |
| ap4,14                               | TA G _ G TTA GGG TT _ GGG TTA GGG TT                                |
| ap5,14                               | TA GG _ TTA GGG TT _ GGG TTA GGG TT                                 |
| ap3,20                               | TA _ GG TTA GGG TTA GGG TT _ GGG TT                                 |
| ap4,20                               | TA G _ G TTA GGG TTA GGG TT _ GGG TT                                |
| ap5,20                               | TA GG _ TTA GGG TTA GGG TT _ GGG TT                                 |
|                                      | <i>clustered G/AP</i>                                               |
| ap3,4                                | TA _ _ G TTA GGG TTA GGG TTA GGG TT                                 |
| ap3,4,5                              | TA _ _ _ TTA GGG TTA GGG TTA GGG TT                                 |
| ap3,11                               | TA _ GG TTA GG _ TTA GGG TTA GGG TT                                 |
| ap3,15                               | TA _ GG TTA GGG TTA _ GG TTA GGG TT                                 |
| ap3,17                               | TA _ GG TTA GGG TTA GG _ TTA GGG TT                                 |
| ap3,21                               | TA _ GG TTA GGG TTA GGG TTA _ GG TT                                 |
| ap3,22                               | TA _ GG TTA GGG TTA GGG TTA G _ G TT                                |
| ap3,23                               | TA _ GG TTA GGG TTA GGG TTA GG _ TT                                 |
| ap4,15                               | TA G _ G TTA GGG TTA _ GG TTA GGG TT                                |
| ap4,8,15                             | TA G _ G TT _ GGG TTA _ GG TTA GGG TT                               |
| ap4,11                               | TA G _ G TTA GG _ TTA GGG TTA GGG TT                                |
| ap4,11,20                            | TA G _ G TTA GG _ TTA GGG TT _ GGG TT                               |
| ap4,22                               | TA G _ G TTA GGG TTA GGG TTA G _ G TT                               |
| ap4,23                               | TA G _ G TTA GGG TTA GGG TTA GG _ TT                                |
| ap5,9                                | TA GG _ TTA _ GG TTA GGG TTA GGG TT                                 |
| ap5,11                               | TA GG _ TTA GG _ TTA GGG TTA GGG TT                                 |
| ap5,15                               | TA GG _ TTA GGG TTA _ GG TTA GGG TT                                 |
| ap5,11,15                            | TA GG _ TTA GG _ TTA _ GG TTA GGG TT                                |
| ap5,21                               | TA GG _ TTA GGG TTA GGG TTA _ GG TT                                 |
| ap5,20,21                            | TA GG _ TTA GGG TTA GGG TT _ _ GG TT                                |
| ap5,23                               | TA GG _ TTA GGG TTA GGG TTA GG _ TT                                 |

**Table S2:** Thermal stabilities of the htel-22 and htel-25 quadruplexes and their AP site modified analogs. T<sub>m</sub> values were measured in 100 mM K<sup>+</sup> (10 mM K-phosphate + 85 mM KCl) and determined from the normalized 1-0 temperature dependences.

| <b>A)</b>          |                        |                         | <b>B)</b>          |                        |                         | <b>C)</b>             |                        |                         |
|--------------------|------------------------|-------------------------|--------------------|------------------------|-------------------------|-----------------------|------------------------|-------------------------|
| <i>htel-22</i>     |                        |                         | <i>htel-25</i>     |                        |                         | <i>htel-25</i>        |                        |                         |
| name               | T <sub>m</sub><br>[°C] | ΔT <sub>m</sub><br>[°C] | name               | T <sub>m</sub><br>[°C] | ΔT <sub>m</sub><br>[°C] | name                  | T <sub>m</sub><br>[°C] | ΔT <sub>m</sub><br>[°C] |
| wt-22              | 66.1                   | -                       | wt-25              | 62.0                   | -                       | <b>clustered G/AP</b> |                        |                         |
| <b>single A/AP</b> |                        |                         | <b>single A/AP</b> |                        |                         | ap3,23                | 36.2                   | -25.8                   |
| ap7                | 66.0                   | -0.1                    | ap8                | 61.0                   | -1.0                    | ap3,15                | 35.8                   | -26.2                   |
| ap13               | 60.0                   | -6.1                    | ap14               | 55.8                   | -6.2                    | ap3,21                | 33.8                   | -28.2                   |
| ap19               | 66.5                   | 0.4                     | ap20               | 62.2                   | 0.2                     | ap3,11                | 32.5                   | -29.5                   |
| <b>double A/AP</b> |                        |                         | <b>triple A/AP</b> |                        |                         | ap3,17                | 32.5                   | -29.5                   |
| ap7,13             | 59.0                   | -7.1                    | ap8,14,20          | 65.3                   | 3.3                     | ap3,22                | 25.0                   | -37.0                   |
| ap7,19             | 60.0                   | -6.1                    | <b>single G/AP</b> |                        |                         | ap3,4,5               | -                      | -                       |
| ap13,19            | 58.0                   | -8.1                    | ap3                | 46.5                   | -15.5                   | ap3,4                 | -                      | -                       |
| <b>triple A/AP</b> |                        |                         | ap4                | 26.0                   | -36.0                   | ap4,8,15              | 25.0                   | -37.0                   |
| ap17,18,19         | 67.5                   | 1.4                     | ap5                | 39.5                   | -22.5                   | ap4,15                | 23.5                   | -38.5                   |
| ap7,13,19          | 68.2                   | 2.1                     | <b>(A+G)/AP</b>    |                        |                         | ap4,23                | 20.7                   | -41.3                   |
|                    |                        |                         | ap3,8              | 46.0                   | -16.0                   | ap4,11,20             | 18.2                   | -43.8                   |
|                    |                        |                         | ap4,8              | 30.0                   | -32.0                   | ap4,11                | 18.0                   | -44.0                   |
|                    |                        |                         | ap5,8              | 43.7                   | -18.3                   | ap4,22                | -                      | -                       |
|                    |                        |                         | ap3,14             | 42.2                   | -19.8                   | ap5,23                | 35.2                   | -26.8                   |
|                    |                        |                         | ap4,14             | -                      | -                       | ap5,21                | 33.8                   | -28.2                   |
|                    |                        |                         | ap5,14             | 36.8                   | -25.2                   | ap5,9                 | 32.0                   | -30.0                   |
|                    |                        |                         | ap3,20             | 40.8                   | -21.2                   | ap5,15                | 31.8                   | -30.2                   |
|                    |                        |                         | ap4,20             | 25.5                   | -36.5                   | ap5,11                | 31.0                   | -31.0                   |
|                    |                        |                         | ap5,20             | 36.2                   | -25.8                   | ap5,20,21             | 27.3                   | -34.7                   |
|                    |                        |                         |                    |                        |                         | ap5,11,15             | 27.0                   | -35.0                   |

**Table S3:** Thermal stabilities of the *htel-22* and *htel-25* quadruplexes and their AP site modified analogs.  $T_m$  values were measured in 100 mM  $\text{Na}^+$  (10 mM Na-phosphate + 85 mM NaCl) and determined from the normalized 1-0 temperature dependences.

A)

| <i>htel-22</i>     |               |                      |
|--------------------|---------------|----------------------|
| name               | $T_m$<br>[°C] | $\Delta T_m$<br>[°C] |
| wt-22              | 57.2          | -                    |
| <b>single A/AP</b> |               |                      |
| ap7                | 51.4          | -5.8                 |
| ap13               | 51.0          | -6.2                 |
| ap19               | 53.8          | -3.4                 |
| <b>triple A/AP</b> |               |                      |
| ap7,13,19          | 38.4          | -18.8                |

B)

| <i>htel-25</i>     |               |                      |
|--------------------|---------------|----------------------|
| name               | $T_m$<br>[°C] | $\Delta T_m$<br>[°C] |
| wt-25              | 50.2          | -                    |
| <b>single A/AP</b> |               |                      |
| ap8                | 50.1          | -0.1                 |
| ap14               | 46.0          | -4.2                 |
| ap20               | 52.0          | 1.8                  |
| <b>triple A/AP</b> |               |                      |
| ap8,14,20          | 33.00         | -17.2                |
| <b>single G/AP</b> |               |                      |
| ap3                | 41.0          | -9.2                 |
| ap4                | 27.0          | -23.2                |
| ap5                | 39.4          | -10.8                |
| <b>(A+G)/AP</b>    |               |                      |
| ap3,8              | 30.0          | -20.2                |
| ap4,8              | 19.8          | -30.4                |
| ap5,8              | 31.0          | -19.2                |
| ap3,14             | 32.4          | -17.8                |
| ap4,14             | -             | -                    |
| ap5,14             | 30.0          | -20.2                |
| ap3,20             | 33.7          | -16.5                |
| ap4,20             | 19.5          | -30.7                |
| ap5,20             | 34.5          | -15.7                |

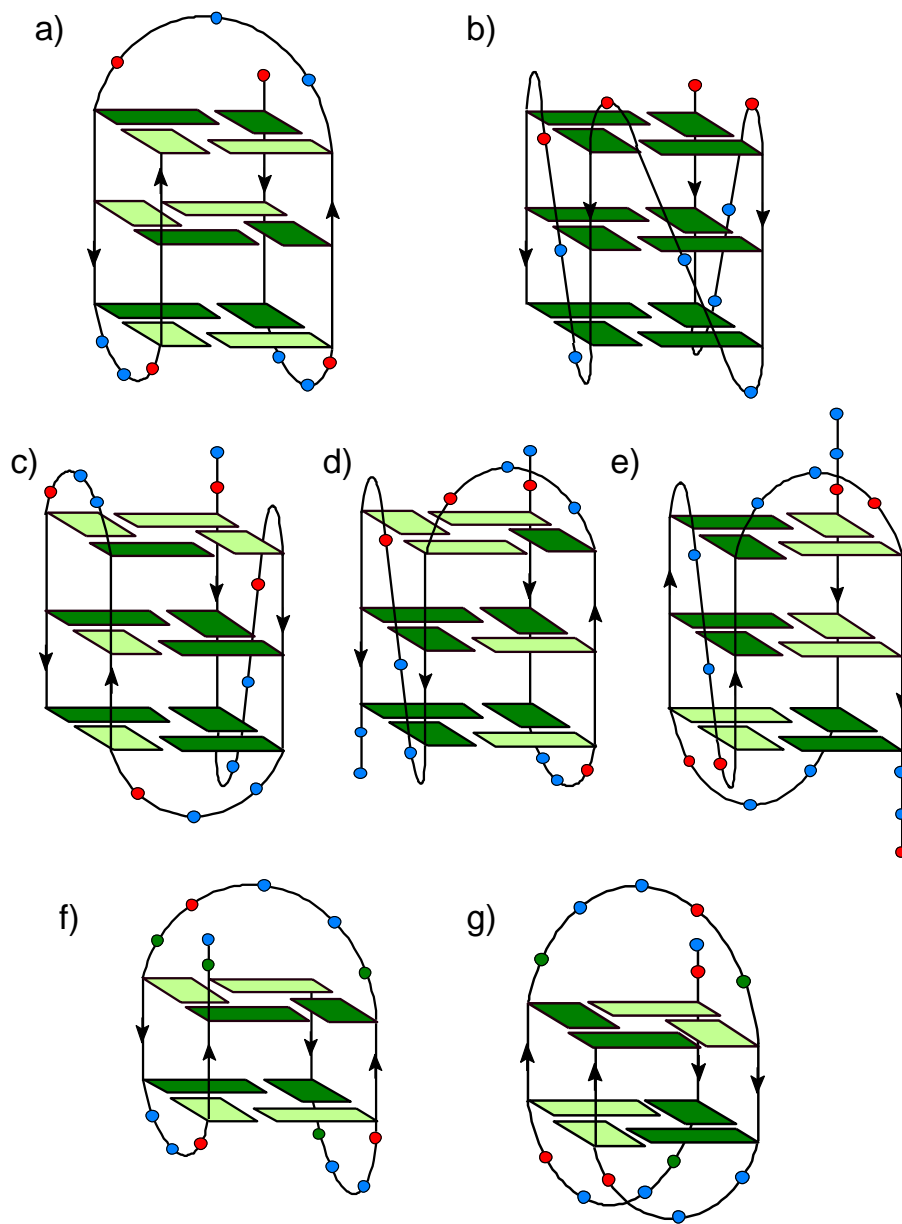

**Figure S1:** Various quadruplex folding topologies observed for human telomere sequences: **(a)** basket-type with edgewise-diagonal-edgewise loop configuration formed in  $\text{Na}^+$  solution (1), **(b)** parallel topology with all loops in propeller-like configuration observed in crystal containing  $\text{K}^+$  ions (2), **(c)** hybrid-1 (h-1) with propeller-like loop followed by two edgewise loops (3-6), and **(d)** hybrid-2 (h-2) two edgewise loops followed by propeller-like loop (6,7), both observed in  $\text{K}^+$  solution, **(e)** (2 + 2) quadruplex with edgewise-propeller-edgewise loop configuration formed in  $\text{Na}^+$  solution (8), **(f)** 2-tetrad basket quadruplex with edgewise-diagonal-edgewise loop formed in  $\text{K}^+$  solution (9,10), and **(g)** 2-tetrad basket quadruplex with edgewise-diagonal-edgewise loop configuration but with a sugar-phosphate backbone running in the opposite direction, formed in  $\text{K}^+$  solution and acidic pH (11). The deoxyadenosine and deoxythymidine residues are shown as red and blue circles, respectively. Tetrad deoxyguanosines in *anti*- and *syn*-conformation are represented by dark and light green rectangles, respectively.

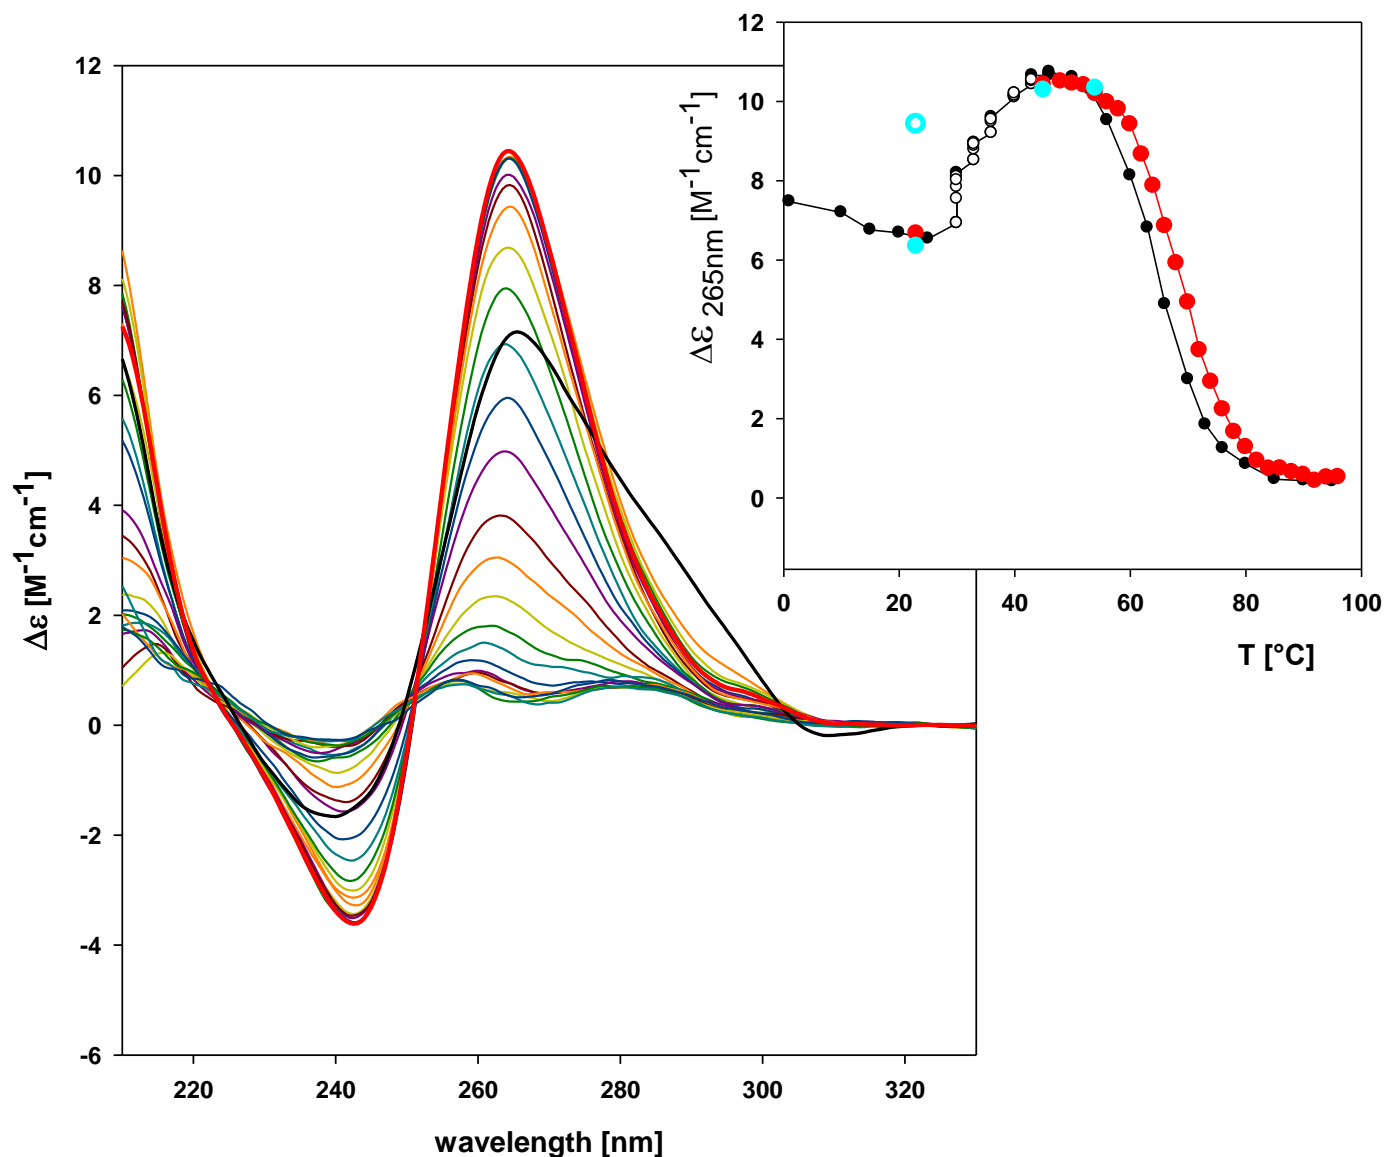

**Figure S2:** CD spectra and melting curves (insert) of ap7,13,19 htel-22 measured in 100 mM K<sup>+</sup>. The black thick spectrum was taken at 23°C. Increasing the temperature resulted in time dependent formation of the parallel quadruplex at 45°C (red spectrum). Further increase in temperature up to 96°C led to quadruplex denaturation accompanied by decrease in CD amplitudes. Insert: Melting curves monitored at 265 nm in 60 mM K<sup>+</sup> (black circles, open circles correspond to non-equilibrium points), in 100 mM K<sup>+</sup> (red points). Starting from 45 °C to 96 °C melting took place; the cyan circles correspond to renaturation which was fast up to about 45 °C and very slow (24 hours – the open circle corresponds to non-equilibrium) returning to room temperature.

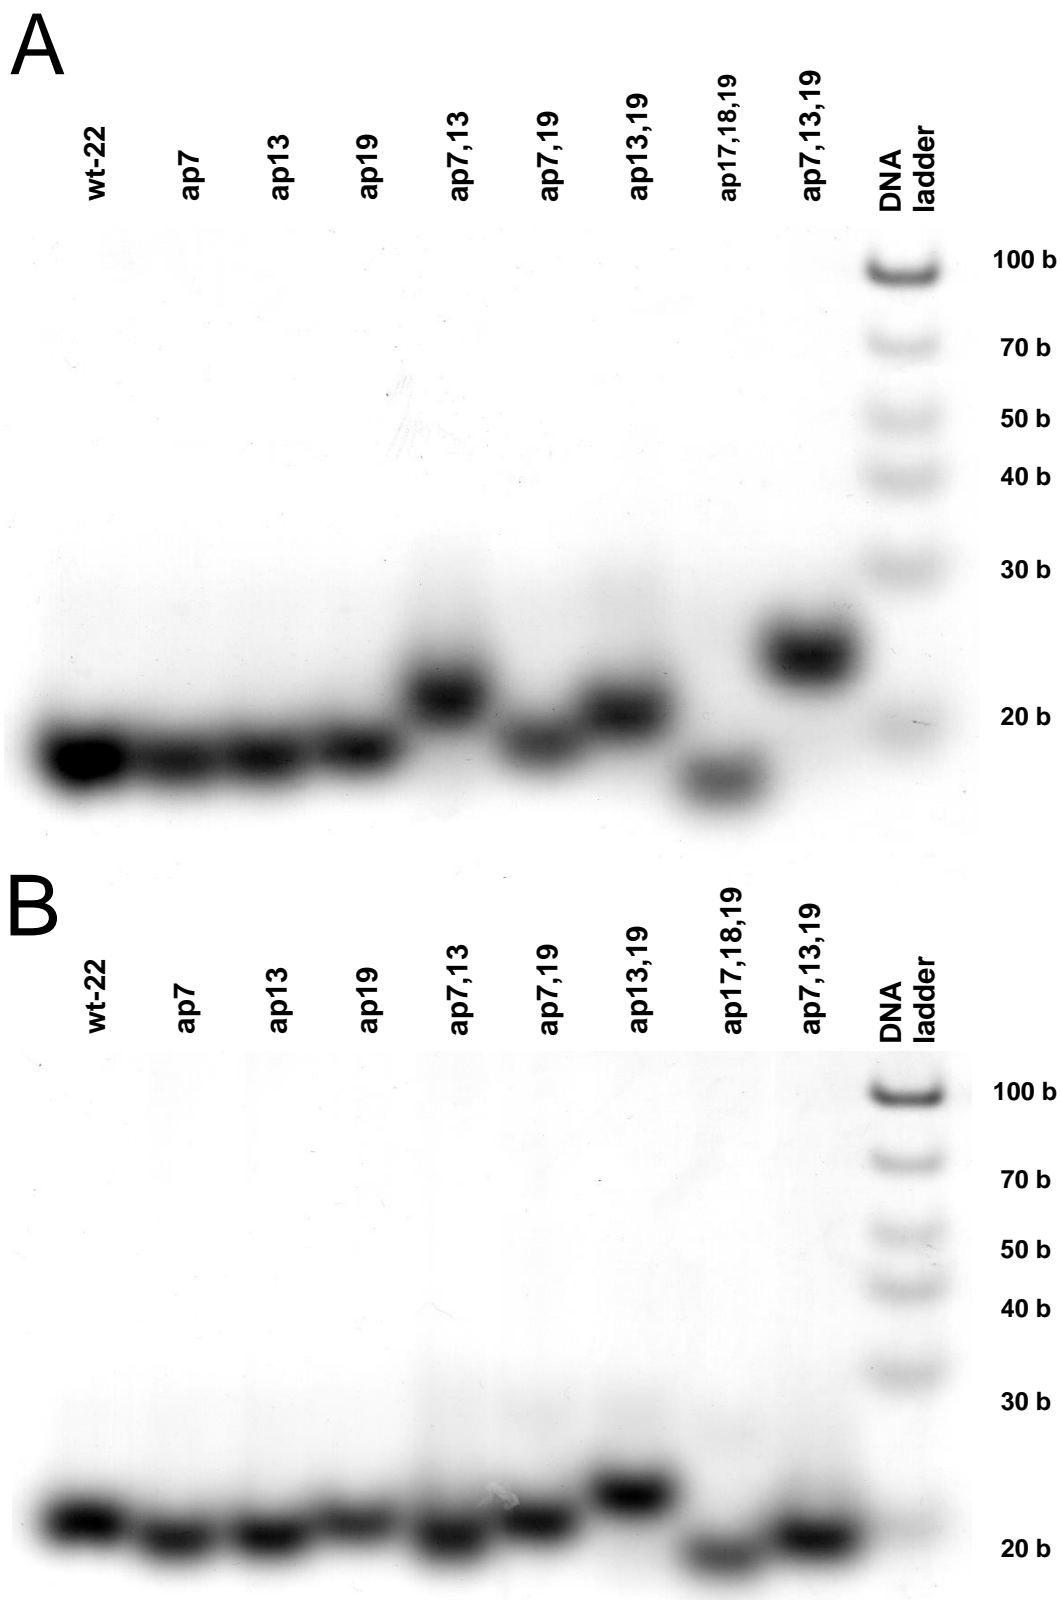

**Figure S3:** Native polyacrylamide gel electrophoresis of htel-22 analogs in (A): 10 mM K-phosphate buffer + 85 mM KCl, pH 7 (100 mM K<sup>+</sup>) run at 35°C and (B): 10 mM Na-phosphate buffer + 85 mM NaCl, pH 7 (100 mM Na<sup>+</sup>) run at 21°C.

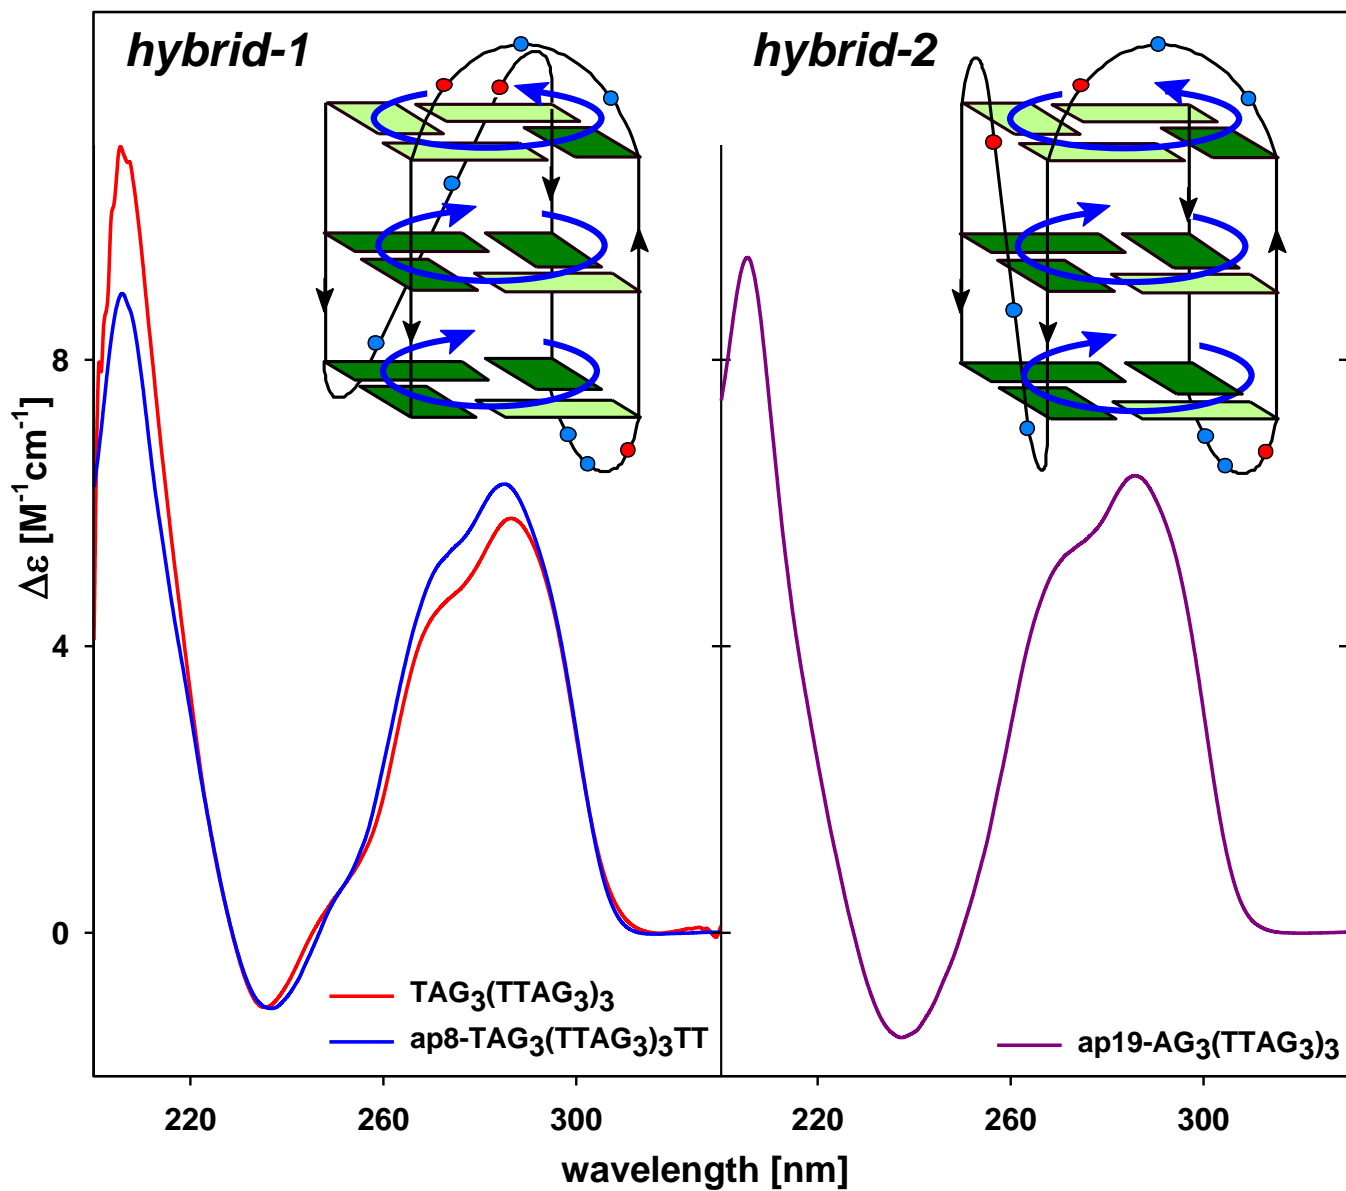

**Figure S4:** The same type of CD spectra provided by (left) htel-23  $\text{TAG}_3(\text{TTAG}_3)_3$  shown (12) to form h-1 quadruplex and of ap8 htel-25  $\text{TAG}_3(\text{TTAG}_3)_3\text{TT}$ , and by (right) ap19 htel-22 shown (13) to form h-2 quadruplex. Inserts: The same orientation of quadruplex tetrads and *anti/syn* guanine glycosidic angles in the two hybrid structures drawn according to (12).



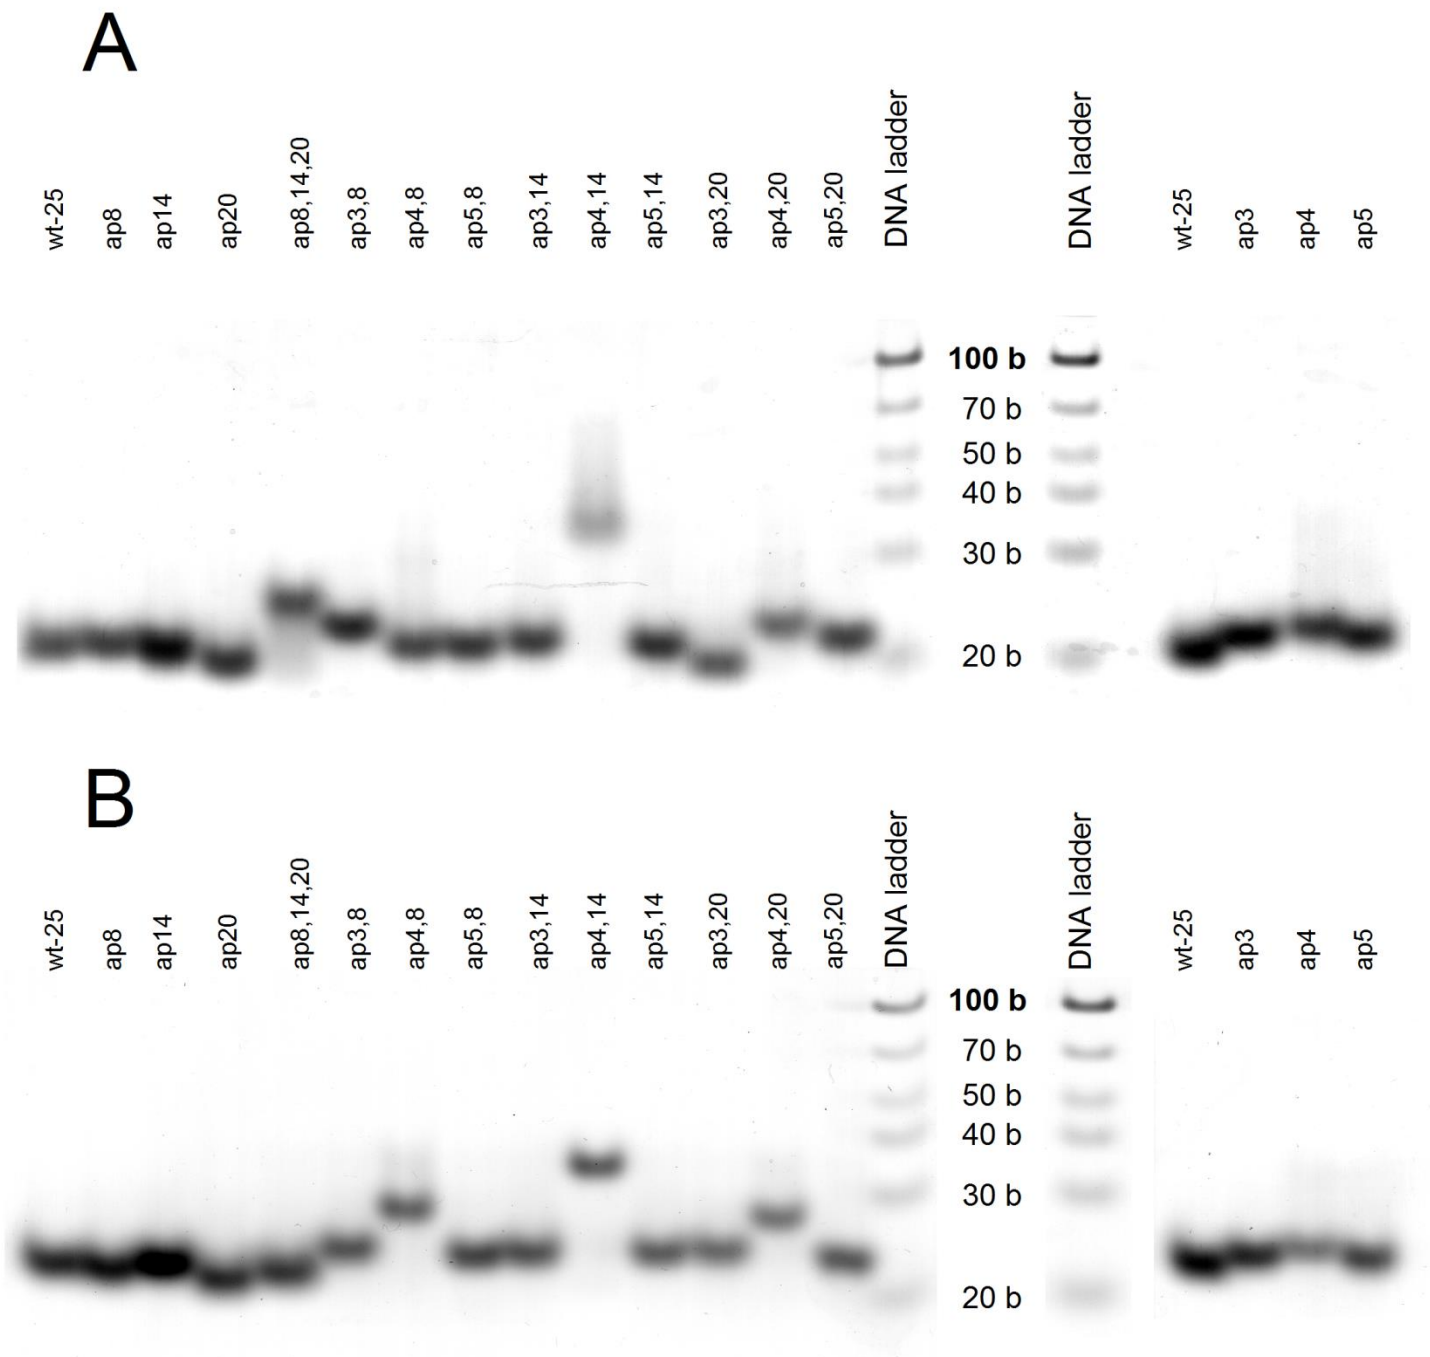

**Figure S5:** Native polyacrylamide gel electrophoresis of the htel-25 analogs in (A): 10 mM K-phosphate buffer + 85 mM KCl, pH 7 (100 mM K<sup>+</sup>) and (B): 10 mM Na-phosphate buffer + 85 mM NaCl, pH 7 (100 mM Na<sup>+</sup>), both run at 21°C.

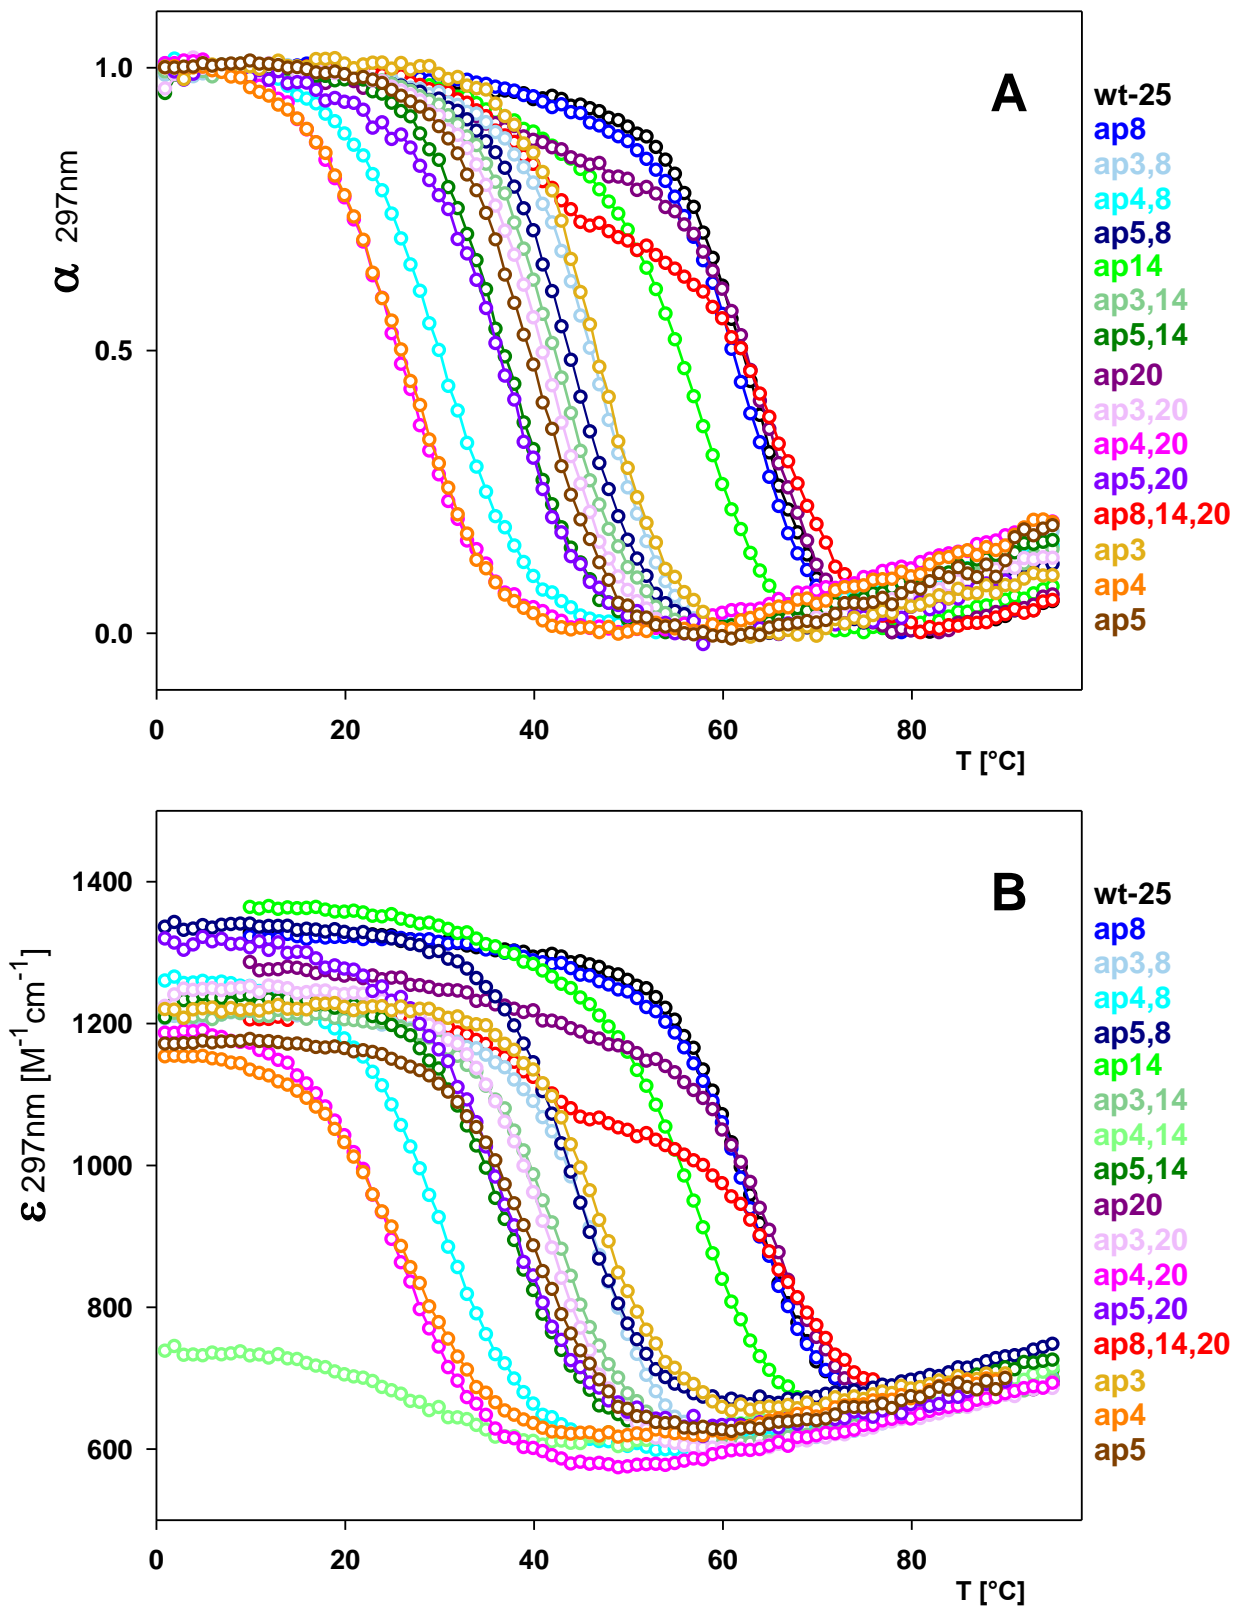

**Figure S6:** (A) Normalized melting profiles (1 stands for native, 0 for denatured state), and (B) melting profiles expressed in molar absorption of htel-25 analogs monitored by UV absorption at 297 nm measured in 100 mM  $\text{K}^+$ .

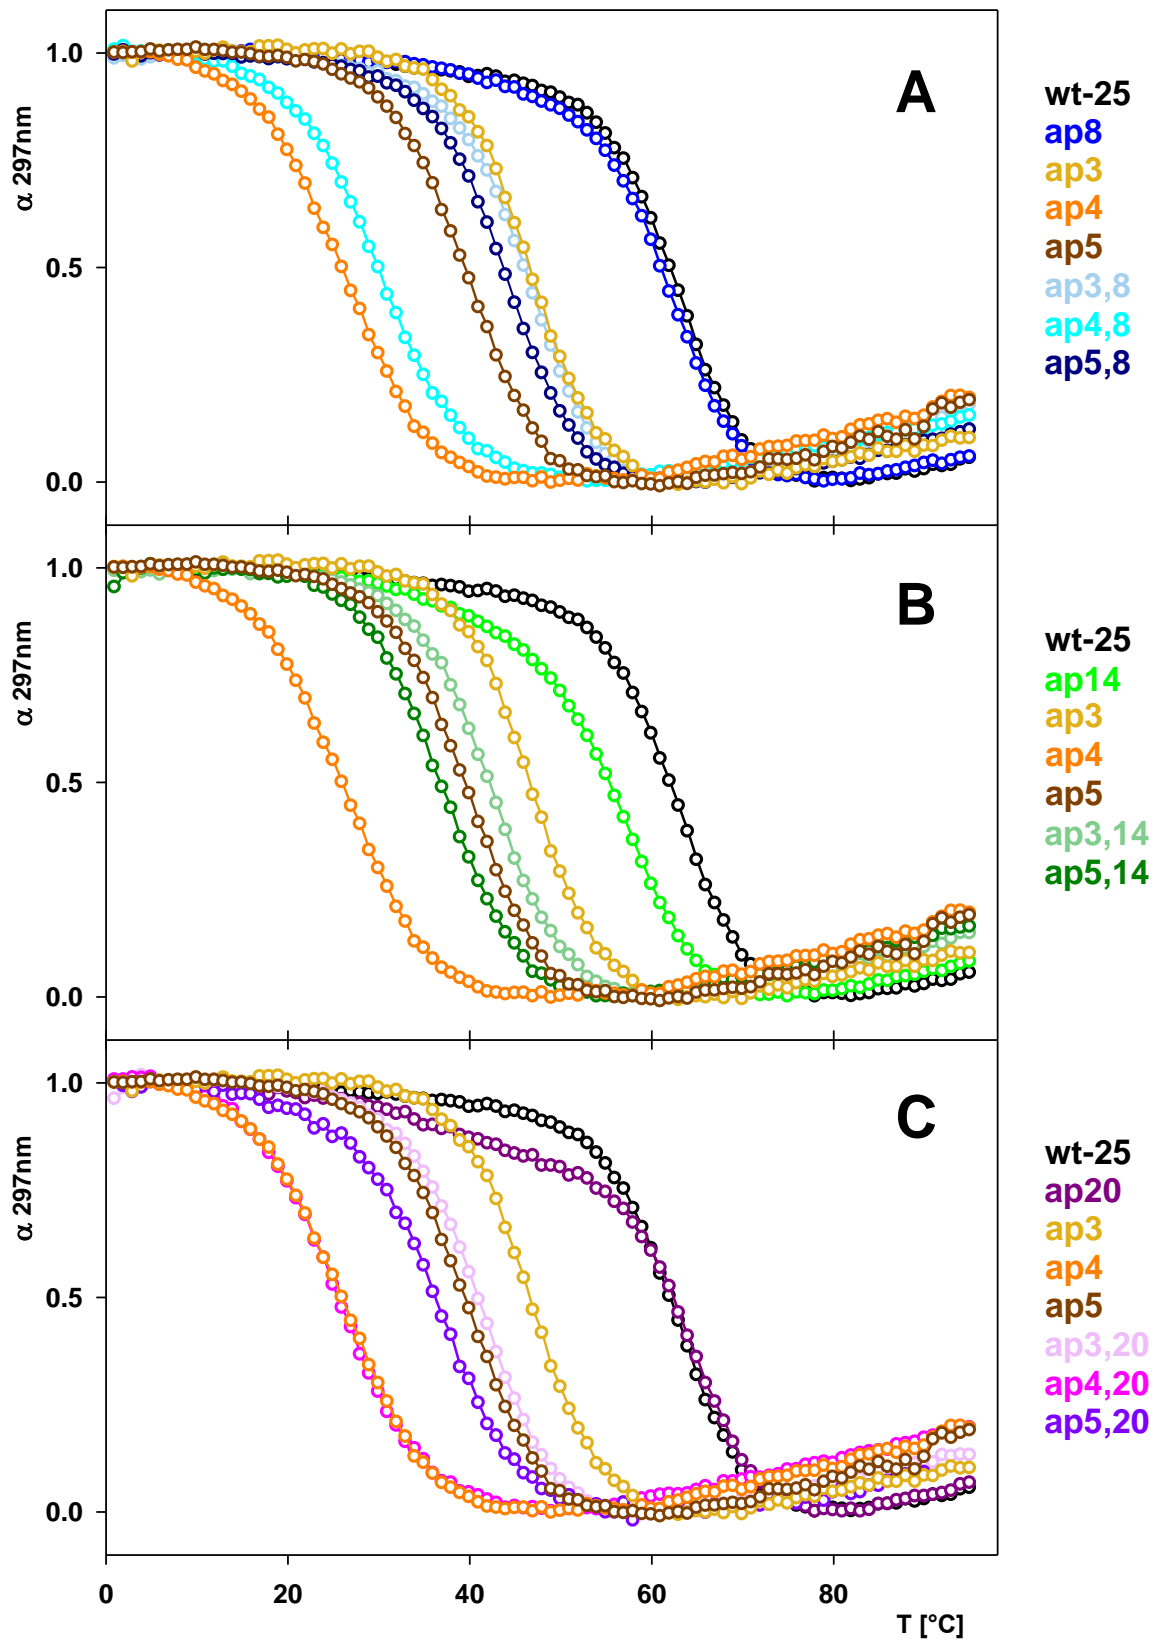

**Figure S7:** Normalized melting profiles of htel-25 wt and its (A+G)/AP analogs monitored by UV absorption at 297 nm measured in 100 mM K<sup>+</sup>.

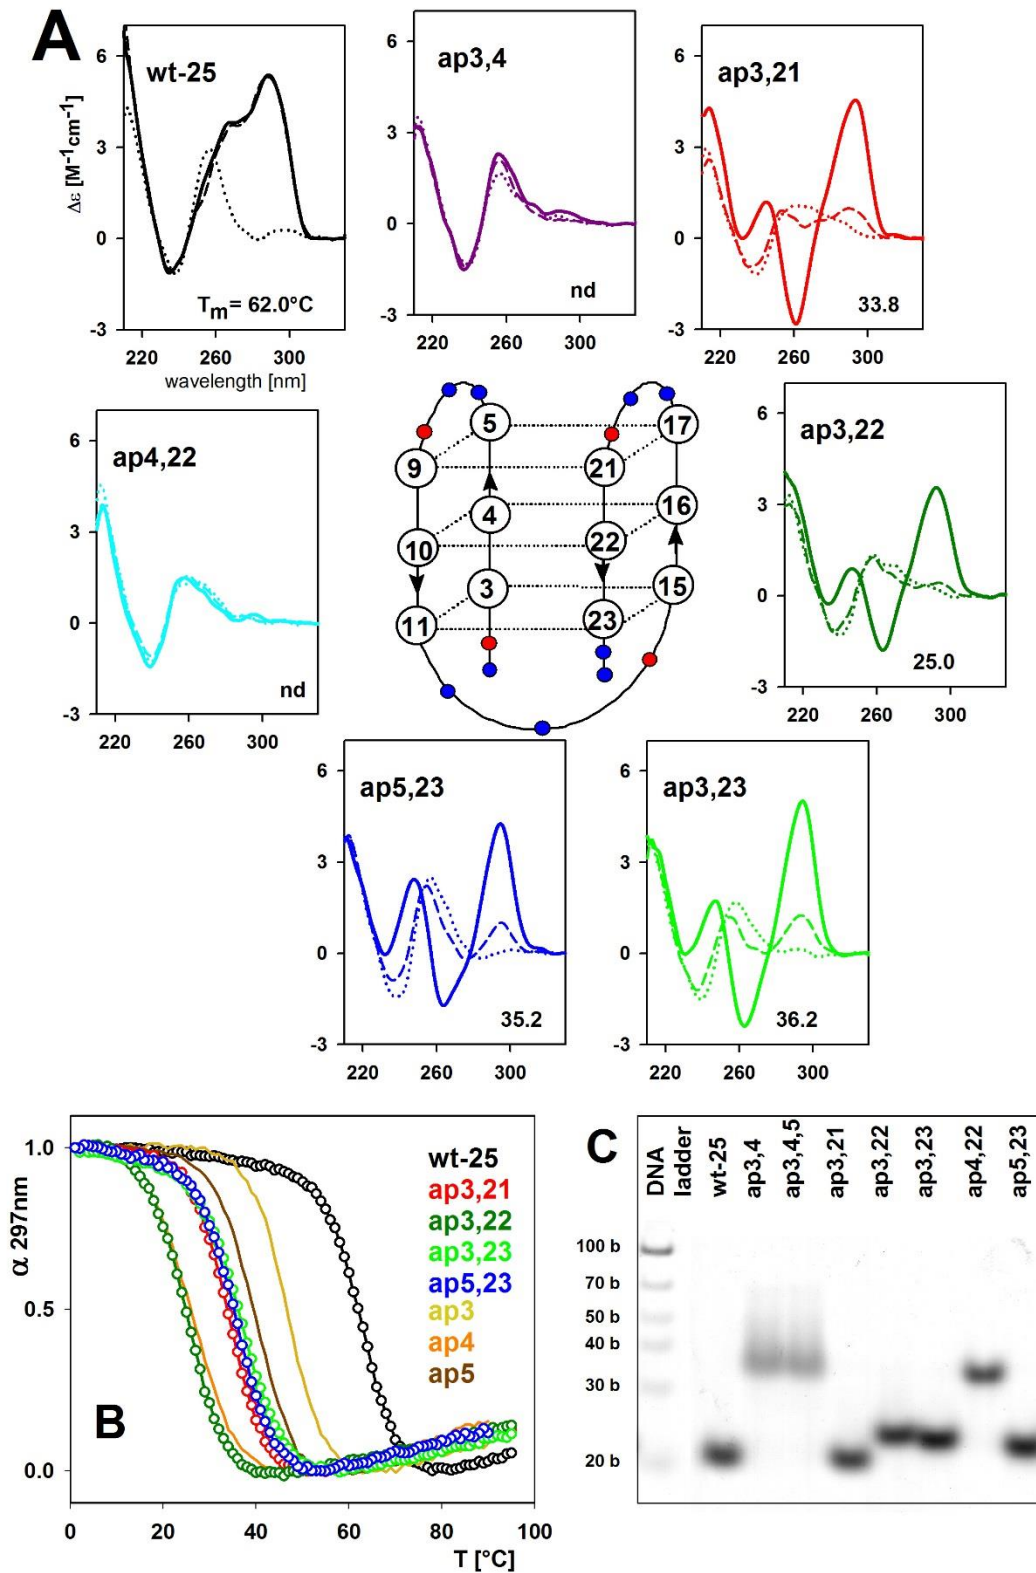

**Figure S8:** Double G/AP sites containing htel-25 analogs: (A) CD spectra in 1 mM sodium phosphate buffer with 0.3 mM EDTA, pH 7.2 (dotted lines), in 10 mM K-phosphate (dashed lines), and in K<sup>+</sup> added up to 100 mM (solid lines); the sketch of the quadruplex with numbering G positions (in the middle); (B) Normalized melting curves and (C) native PAGE. All measurements were undertaken in 100 mM K<sup>+</sup> at 21°C.

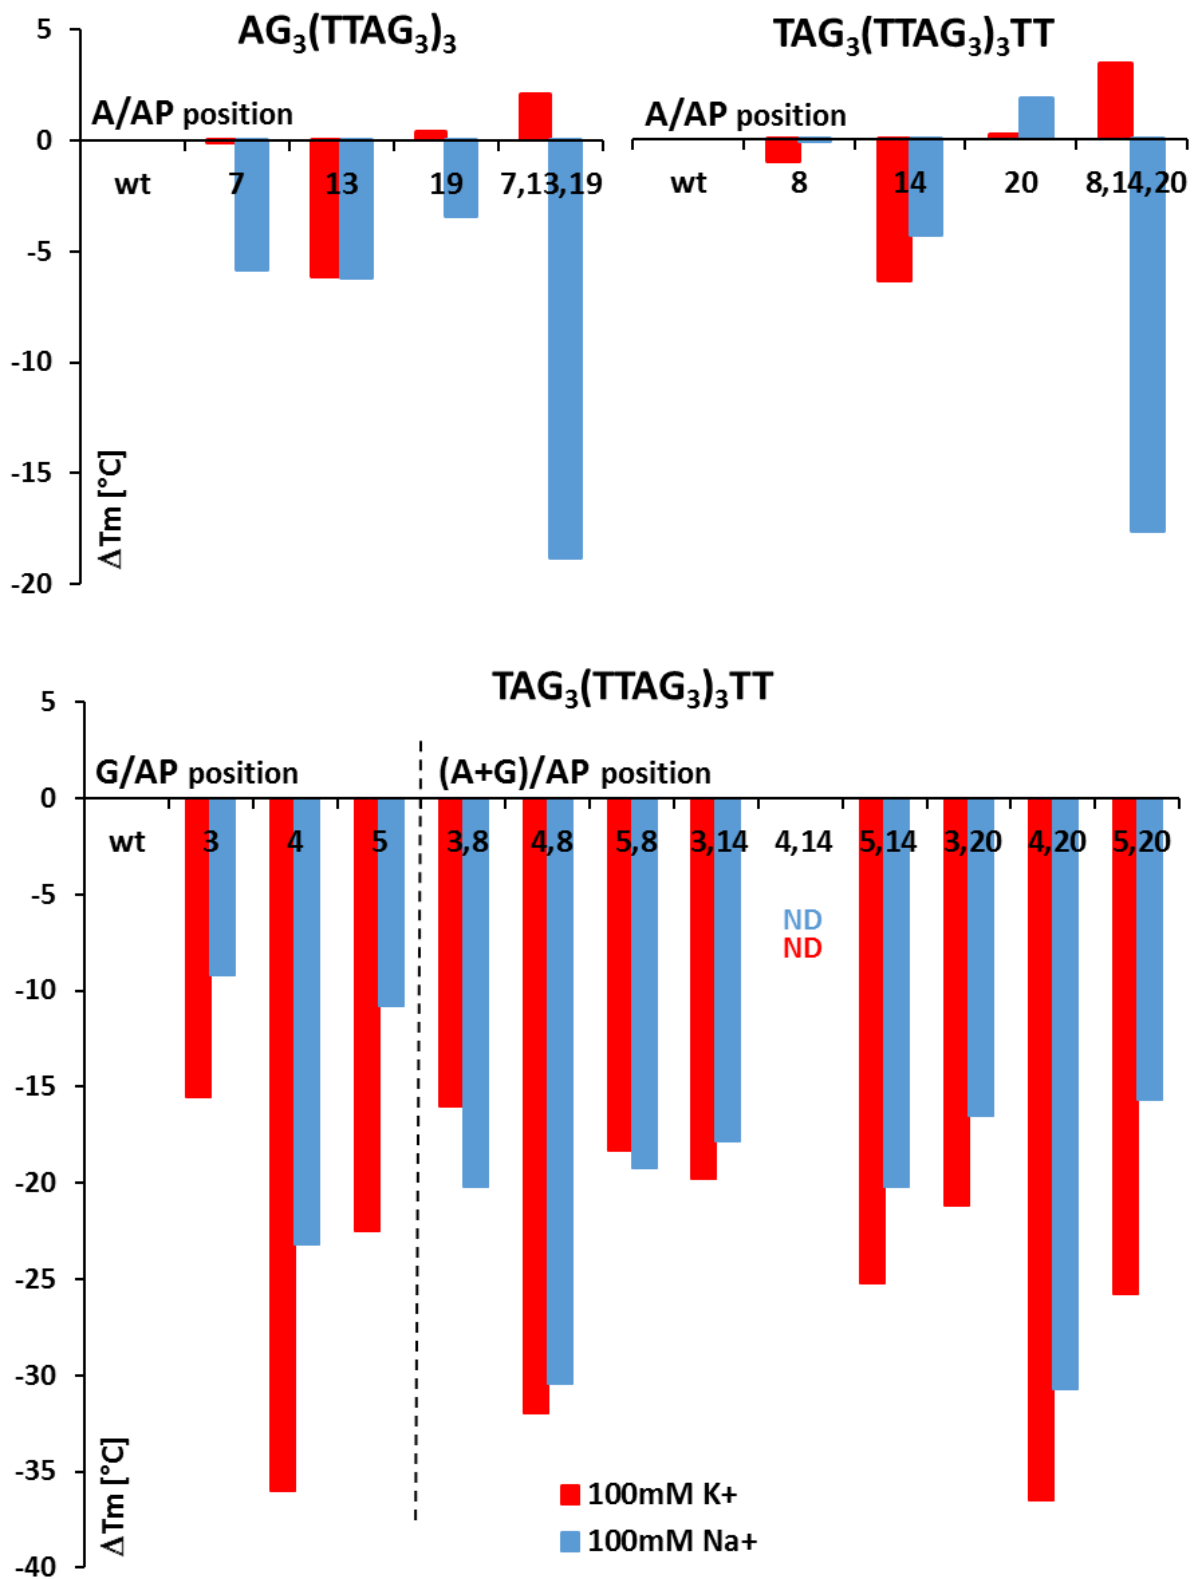

**Figure S9:** Column graphs of changes in T<sub>m</sub> values caused by A/AP lesions (upper panels) in htel-22 (left) and htel-25 (right) analogs and by G/AP (left) and (A+G)/AP (right) lesions (bottom panels) in htel-25 analogs, compared to their wt's, in 100 mM K<sup>+</sup> or 100 mM Na<sup>+</sup>.

## References

1. Wang, Y. and Patel, D.J. (1993) Solution structure of the human telomeric repeat d[AG<sub>3</sub>(T<sub>2</sub>AG<sub>3</sub>)<sub>3</sub>] G-tetraplex. *Structure*, **1**, 263–282.
2. Parkinson, G.N., Lee, M.P.H. and Neidle, S. (2002) Crystal structure of parallel quadruplexes from human telomeric DNA. *Nature*, **417**, 876–880.
3. Ambrus, A., Chen, D., Dai, J., Bialis, T., Jones, R.A. and Yang, D. (2006) Human telomeric sequence forms a hybrid-type intramolecular G-quadruplex structure with mixed parallel/antiparallel strands in potassium solution. *Nucleic Acids Res.*, **34**, 2723–2735.
4. Luu, K.N., Phan, A.T., Kuryavyi, V., Lacroix, L. and Patel, D.J. (2006) Structure of the human telomere in K<sup>+</sup> solution: an intramolecular (3 + 1) G-quadruplex scaffold. *J. Am. Chem. Soc.*, **128**, 9963–9970.
5. Dai, J., Punchihewa, C., Ambrus, A., Chen, D., Jones, R.A. and Yang, D. (2007) Structure of the intramolecular human telomeric G-quadruplex in potassium solution: a novel adenine triple formation. *Nucleic Acids Res.*, **35**, 2440–2450.
6. Phan, A.T., Kuryavyi, V., Luu, K.N. and Patel, D.J. (2007) Structure of two intramolecular G-quadruplexes formed by natural human telomere sequences in K<sup>+</sup> solution. *Nucleic Acids Res.*, **35**, 6517–6525.
7. Dai, J., Carver, M., Punchihewa, C., Jones, R.A. and Yang, D. (2007) Structure of the hybrid-2 type intramolecular human telomeric G-quadruplex in K<sup>+</sup> solution: insights into structure polymorphism of the human telomeric sequence. *Nucleic Acids Res.*, **35**, 4927–4940.
8. Lim, K.W., Ng, V.C.M., Martín-Pintado, N., Heddi, B. and Phan, A.T. (2013) Structure of the human telomere in Na<sup>+</sup> solution: an antiparallel (2+2) G-quadruplex scaffold reveals additional diversity. *Nucleic Acids Res.*, **41**, 10556–10562.
9. Lim, K.W., Amrane, S., Bouaziz, S., Xu, W., Mu, Y., Patel, D.J., Luu, K.N. and Phan, A.T. (2009) Structure of the human telomere in K<sup>+</sup> solution: a stable basket-type G-quadruplex with only two G-tetrad layers. *J. Am. Chem. Soc.*, **131**, 4301–4309.
10. Zhang, Z., Dai, J., Veliath, E., Jones, R.A. and Yang, D. (2010) Structure of a two-G-tetrad intramolecular G-quadruplex formed by a variant human telomeric sequence in K<sup>+</sup> solution: insights into the interconversion of human telomeric G-quadruplex structures. *Nucleic Acids Res.*, **38**, 1009–1021.
11. Galer, P., Wang, B., Šket, P., Plavec, L. (2016) Reversible pH Switch of Two-Quartet G-Quadruplexes Formed by Human Telomere. *Angewandte Chemie* **55**, 1993-1997.
12. Phan, A.T., Luu, K.N., Patel, D.J. (2006) Different loop arrangements of intramolecular human telomeric (3+1) G-quadruplex in K solution. *Nucleic Acids Res.* **34**, 5715-19.
13. Babinsky, M., Fiala, R., Kejnovska, I., Bednarova, K., Marek, R., Sagi, J., Sklenar, V., Vorlickova, M. (2014) Loss of loop adenines alters human telomere d[AG<sub>3</sub>(TTAG<sub>3</sub>)<sub>3</sub>] quadruplex folding. *Nucleic Acids Res.* **42**, 14031-14041.
